# Supplementary material
Source: HighWire-hosted journal article supplement (https://bmjopenrespres.bmj.com/content/8/1/e001104)
Supplement: inline-supplementary-material-1 [file inline-supplementary-material-1.pdf]

**Table S1. Mask types, manufacturers, and models included in the study.**

|                       | <b>n</b>    | <b>%</b>   | <b>Masks used (n)</b>                                                                                                                   |
|-----------------------|-------------|------------|-----------------------------------------------------------------------------------------------------------------------------------------|
| <b>Nasal masks</b>    | <b>1188</b> | <b>100</b> |                                                                                                                                         |
| Resmed                | 977         | 82.2       | Mirage micro (377), Mirage FX (254), Mirage Softgel (251), Mirage Activa (58), Airfit N10 (20), Swift FX nano (17)                      |
| Philips Respironics   | 136         | 11.4       | Comfort Classic (122), Comfort Select (7), Profile Lite (7)                                                                             |
| Fisher & Paykel       | 75          | 6.3        | Flexifit 407 (38), Flexifit 406 (23), Eson 2 (13), Zest (1)                                                                             |
| <b>Nasal pillows</b>  | <b>400</b>  | <b>100</b> |                                                                                                                                         |
| Resmed                | 381         | 95.2       | Swift FX (205), Swift LT (141), Airfit P10 (18), Mirage Swift II (13), n.s. (4)                                                         |
| Philips Respironics   | 19          | 4.8        | Optilife (19)                                                                                                                           |
| Fisher & Paykel       | 0           | 0          |                                                                                                                                         |
| <b>Oronasal masks</b> | <b>221</b>  | <b>100</b> |                                                                                                                                         |
| Resmed                | 161         | 72.9       | Mirage Quattro (92), Quattro FX (25), Ultra mirage (18), Quattro Air (12), Mirage Liberty (6), Airfit F10 (4), n.s. (3), Airfit F20 (1) |
| Philips Respironics   | 4           | 1.8        | Comfort Gel (2), n.s. (2)                                                                                                               |
| Fisher & Paykel       | 56          | 25.3       | Simplus (52), Flexifit 431 (4)                                                                                                          |
| <b>Missing</b>        | <b>34</b>   |            |                                                                                                                                         |

Abbreviations. N = number of masks, n.s. = not specified mask model, but brand or mask type known.
